# Supplementary material
Source: PubMed Central journal article supplement (PMC5069510)
Supplement: rspb20161453supp3.pdf [file rspb20161453supp3.pdf]

| Organism                   | GB Access number               | Group     |
|----------------------------|--------------------------------|-----------|
| Acytostelium_subglobosum   | XP_012752692                   | Amoebozoa |
| Cavostelium_apophysatum_c1 | GB XXXXX                       | Amoebozoa |
| Polysphondylium_pallidum   | PPA1292846                     | Amoebozoa |
| Schizoplasmodiopsis_vulgar | GB XXXXX                       | Amoebozoa |
| Echinamoeba_exudans        | GB XXXXX                       | Amoebozoa |
| Dictyotellium_discoideum   | DDB0231571                     | Amoebozoa |
| Ceratiomyxa_fruticulosa    | GB XXXXX                       | Amoebozoa |
| Amoeba_proteus             | GB XXXXX                       | Amoebozoa |
| Arcella_vulgaris           | GB XXXXX                       | Amoebozoa |
| Copromyxa_protea           | GB XXXXX                       | Amoebozoa |
| Filamoeba_nolandii         | GB XXXXX                       | Amoebozoa |
| Clastostelium_recurvatum   | GB XXXXX                       | Amoebozoa |
| Physarum_polycephalum      | GDRG01007044.1                 | Amoebozoa |
| Nolandella_sp.             | GB XXXXX                       | Amoebozoa |
| Cryptodiffugia_operculata  | GB XXXXX                       | Amoebozoa |
| Rhizamoeba_saxonica        | GB XXXXX                       | Amoebozoa |
| Echinosteliopsis_oligospor | GB XXXXX                       | Amoebozoa |
| Vermamoeba_vermiformes     | GB XXXXX                       | Amoebozoa |
| Diffugia_sp.               | GB XXXXX                       | Amoebozoa |
| Vannella_robusta           | GB XXXXX                       | Amoebozoa |
| Thecamonas_trahens         | XP_013752890.1                 | Apusozoa  |
| Blastocystis_hominis       | XP_012897058.1                 | SAR       |
| Blastocystis_sp.           | XP_014528311.1                 | SAR       |
| Hyphochytrium_catenoides   | CAFC02029155.1                 | SAR       |
| Pythium_vexans             | KE499774.1                     | SAR       |
| Phytophthora_infestans     | XP_002901651.1                 | SAR       |
| Phytophthora_ramorum       | fgenes1_pm.C_scaffold_17000003 | SAR       |
| Saprolegnia_parasitica     | XP_012207801.1                 | SAR       |
| Aphanomyces_astaci         | XP_009831112.1                 | SAR       |
| Phytophthora_cinnamomi     | LGSJ01000500.1                 | SAR       |
| Aphanomyces_invadans       | XP_008871148.1                 | SAR       |
| Heterococcus_sp.           | AXNI01004165.1                 | SAR       |

|                            |                |               |
|----------------------------|----------------|---------------|
| Klebsormidium_flaccidum    | DF237307.1     | Chlorophyta   |
| Mesostigma_viride          | GBSK01011320.1 | Chlorophyta   |
| Chlorokybus_atmophyticus   | JO194492.1     | Chlorophyta   |
| Azolla_filiculoides        | BTV01027769.1  | Chlorophyta   |
| Lygodium_japonicum         | FX949761.1     | Chlorophyta   |
| Araucaria_cunninghami      | GCKF01061597.1 | Chlorophyta   |
| Cycas_revoluta_recA2       | GBJU01013794.1 | Chlorophyta   |
| Pinus_monticola            | GBQX01043505.1 | Chlorophyta   |
| Amborella_trichopoda       | XP_011623481.1 | Chlorophyta   |
| Zea_mays_recA1             | NP_001148809.1 | Chlorophyta   |
| Zea_mays_recA2             | NP_001170211.1 | Chlorophyta   |
| Zea_mays_recA3             | NP_001130273.1 | Chlorophyta   |
| Zea_mays_recA4             | XP_008672594.1 | Chlorophyta   |
| Populus_trichocarpa_recA1  | XP_006370468.1 | Chlorophyta   |
| Populus_trichocarpa_recA2  | XP_002308284.1 | Chlorophyta   |
| Populus_trichocarpa_recA3  | XP_006371978.1 | Chlorophyta   |
| Populus_trichocarpa_recA4  | XP_002323326.2 | Chlorophyta   |
| Populus_trichocarpa_recA5  | XP_002308017.2 | Chlorophyta   |
| Arabidopsis_thaliana_RecA1 | NP_565198      | Chlorophyta   |
| Arabidopsis_thaliana_RecA3 | NP_179539      | Chlorophyta   |
| Arabidopsis_thaliana_RecA2 | AAF04410.1     | Chlorophyta   |
| Oryza_sativa_RecA4         | XP_015612195   | Chlorophyta   |
| Oryza_sativa_RecA1         | BAS85420       | Chlorophyta   |
| Oryza_sativa_RecA2         | EEE55988.1     | Chlorophyta   |
| Oriza_sativa_recA3         | AAX94919.1     | Chlorophyta   |
| Ricinus_communis_RecA1     | XP_015581329   | Chlorophyta   |
| Ricinus_communis_RecA2     | XP_002514123   | Chlorophyta   |
| Physcomitrella_patens      | NW_001865354.1 | Chlorophyta   |
| Arthrospira_plantensis     | WP_014275106.1 | Cyanobacteria |
| Gloeocapsa_sp.             | WP_006530402.1 | Cyanobacteria |
| Geitlerinema_sp.           | WP_015170153.1 | Cyanobacteria |
| Thermosynechococcus_elonga | WP_011057924.1 | Cyanobacteria |
| Pleurocapsa_sp.            | WP_019504184.1 | Cyanobacteria |

|                            |                |                     |
|----------------------------|----------------|---------------------|
| Paulinella_chromatophora_c | CP000815.1     | Rhizaria            |
| Galdieria_sulphuraria      | XP_005704726.1 | Rhodophyta          |
| Cyanidioschyzon_merolae    | XP_005536490   | Rhodophyta          |
| Saccharina_japonica        | JXRI01000062.1 | SAR                 |
| Ectocarpus_siliculosus     | CBJ28124.1     | SAR                 |
| Bolidomonas_sp.            | GAUD01002030.1 | SAR                 |
| Leptocylindrus_danicus     | GAUB01012910.1 | SAR                 |
| Thalassiosira_pseudonana   | XP_002295563.1 | SAR                 |
| Hemiaulus_sp.              | GAUA01007909.1 | SAR                 |
| Phaeodactylum_tricornutum  | XP_002177339.1 | SAR                 |
| Ostreococcus_tauri         | XP_003081716   | Chlorophyta         |
| Bathycoccus_prasinus       | NC_023998.1    | Chlorophyta         |
| Chlorella_sorokiana        | GAPD01025776.1 | Chlorophyta         |
| Auxenochlorella_prototheco | NW_011934162.1 | Chlorophyta         |
| Tetraselmis_subcordiformis | GANN01009802.1 | Chlorophyta         |
| Chlamydomonas_reinhardtii  | XP_001700975   | Chlorophyta         |
| Volvox_carteri             | XP_002955087   | Chlorophyta         |
| Bryum_argentum             | GCZP01036826.1 | Chlorophyta         |
| Nitella_mirabilis          | GBST01050103.1 | Chlorophyta         |
| Cycas_revoluta_recA1       | GBJU01013794.1 | Chlorophyta         |
| Pinus_massoniana           | GAQR01008503.1 | Chlorophyta         |
| Spirogyra_pratensis        | GBSM01012683.1 | Chlorophyta         |
| Nitrosomas_ureaeB          | ALQ50787.1     | Betaproteobacteria  |
| Laribacter_hongkongensis   | WP_012696278.1 | Betaproteobacteria  |
| Tepidiphulus_margaritifer  | WP_028873951.1 | Betaproteobacteria  |
| Methylotenera_versatilis   | WP_047541300.1 | Betaproteobacteria  |
| Hydrogenophaga_sp.         | EWS64033.1     | Betaproteobacteria  |
| Ferrovum_myxofaciens       | WP_031597444.1 | Betaproteobacteria  |
| Simplicispira_psychrophila | WP_051603261.1 | Betaproteobacteria  |
| Snodgrassella_alvi         | WP_037392494.1 | Betaproteobacteria  |
| Polaromonas_sp.            | WP_011485555.1 | Betaproteobacteria  |
| Aquifex_aeolicus           | NP_214474      | Betaproteobacteria  |
| Agrobacterium_tumefaciensA | NP_354855      | Alphaproteobacteria |

|                            |                |                       |
|----------------------------|----------------|-----------------------|
| Bacillus_anthraxis         | YP_022663      | Firmicutes            |
| Burkholderia_malleiB       | YP_102098      | Betaproteobacteria    |
| Brucella_suisA             | NP_698206      | Alphaproteobacteria   |
| Clostridium_botulinum_Firm | YP_001787715.1 | Firmicutes            |
| Coxiella_burnetiiG         | NP_820055      | Gammaproteobacteria   |
| Campylobacter_jejuniE      | YP_002345041   | Epsilonproteobacteria |
| Clostridium_perfringens    | WP_003459804   | Firmicutes            |
| Chlamydomphila_pneumoniae  | CRI33281       | Chlamydiae            |
| Chlorobium_tepidum         | NP_662807      | Chlorobi              |
| Dehalococcoides_ethenogene | YP_182301      | Chloroflexi           |
| Deinococcus_radiodurans    | NP_296061      | Deinococcus -Thermus  |
| Escherichia_coliG          | ESA73300       | Gammaproteobacteria   |
| Francisella_tularensisG    | WP_003013734   | Gammaproteobacteria   |
| Geobacter_sulfurreducensD  | WP_010940821   | Deltaproteobacteria   |
| Listeria_monocytogenes     | WP_003732286   | Firmicutes            |
| Rhodopirellula_baltica     | EGF27088       | Planctomycetes        |
| Ralstonia_solanacearumB    | WP_011000510   | Betaproteobacteria    |
| Rickettsia_typhiA          | YP_067686      | Alphaproteobacteria   |
| Staphylococcus_aureus      | NP_371809      | Firmicutes            |
| Streptococcus_pneumoniae   | NP_346368      | Firmicutes            |
| Thermotoga_maritima        | NP_229655      | Thermotogae           |
| Treponema_pallidum         | NP_219129      | Spirochaetes          |
| Vibrio_choleraeG           | NP_230194      | Gammaproteobacteria   |
| Wolinella_succinogenesE    | NP_907645      | Epsilonproteobacteria |
| Yersinia_pestisG           | YP_002348203   | Gammaproteobacteria   |
| Rhodobacter_capsulatusA    | CAA57673.1     | Alphaproteobacteria   |
| Anaplasma_centraleA        | ABD34619.1     | Alphaproteobacteria   |
| Gluconobacter_oxydansA     | AAA73517.1     | Alphaproteobacteria   |
| Acetobacter_pasteurianusA  | BAI13443.1     | Alphaproteobacteria   |
| Sphingobium_japonicumA     | BAI98115.1     | Alphaproteobacteria   |
| Endosymbiont_AcanthamoebaA | AIF81566.1     | Alphaproteobacteria   |
| Chaetoceros_affinis        | GBSA01013535.1 | SAR                   |
| Bacillus_Phage             | YP_009218156   | Phage Virus           |

|                               |                   |                      |
|-------------------------------|-------------------|----------------------|
| Mycobacterium_Phage1          | YP_002014584      | Phage Virus          |
| Mycobacterium_Phage2          | NP_817564         | Phage Virus          |
| Oscillatoria_nigroviridis     | WP_015174639      | Cyanobacteria        |
| Prochlorococcus_marinus       | WP_011125865      | Cyanobacteria        |
| Staniera_cyanosphaera         | WP_015194042      | Cyanobacteria        |
| Geminocystis_herdmanii        | WP_026102060      | Cyanobacteria        |
| Aphanocapsa_montana           | WP_026102060      | Cyanobacteria        |
| Synechococcus_elongatus       | WP_011057924.1    | Cyanobacteria        |
| Phycisphaera_mikurensis       | WP_014435553      | Planctomycetes       |
| Thermocrinis_ruber            | WP_038531930      | Aquificae            |
| Psychrilyobacter_atlanticus   | WP_028854876      | Fusobacteria         |
| Fusobacterium_nucleatum       | WP_008802497      | Fusobacteria         |
| Ilyobacter_polytropus         | WP_013386609      | Fusobacteria         |
| Thermocrinis_albus            | WP_012992093      | Aquificae            |
| Sebaldella_termitidis         | WP_049768991      | Fusobacteria         |
| Chlamydia_psittaci            | WP_006343655      | Chlamydiae           |
| Thermosipho_melanesiensis     | WP_012057372      | Thermotogae          |
| Fusobacterium_ulcerans        | WP_005981580      | Fusobacteria         |
| Hydrogenobacter_thermophil    | WP_012963430      | Aquificae            |
| Chlamydia_trachomatis         | WP_009872817      | Chlamydiae           |
| Hydrogenobaculum_sp.          | WP_015419933      | Aquificae            |
| Thermovibrio_ammonificans     | WP_013538419      | Aquificae            |
| Leptotrichia_hofstadii        | WP_026746688      | Fusobacteria         |
| Isosphaera_pallida            | ADV62543          | Planctomycetes       |
| Chlorobium_chlorochromatii    | WP_041466397      | Chlorobi             |
| Waddlia_chondrophila          | WP_013183004      | Chlamydiae           |
| Sulfurihydrogenibium_azorense | WP_012674242      | Aquificae            |
| Blastopirellula_marina        | EAQ81994          | Planctomycetes       |
| Fervidobacterium_pennivora    | NC_017095.1       | Thermotogae          |
| Marinithermus_hydrothermal    | NC_015387.1       | Deinococcus -Thermus |
| Sphaerobacter_thermophilus    | NC_013523.1       | Chloroflexi          |
| Thermomicrobium_roseum        | NC_011959.1       | Chloroflexi          |
| Thermanaerothrix_daxensis     | NZ_LGKO01000002.1 | Chloroflexi          |

|                            |                |                       |
|----------------------------|----------------|-----------------------|
| Anaerolinea_thermophila    | NC_014960.1    | Chloroflexi           |
| Chloroflexus_aggregans     | NC_011831.1    | Chloroflexi           |
| Roseiflexus_castenholzii   | NC_009767.1    | Chloroflexi           |
| Meiothermus_ruber          | NC_013946.1    | Deinococcus -Thermus  |
| Caldilinea_aerophila       | NC_017079.1    | Chloroflexi           |
| Deinococcus_proteolyticus  | NC_015161.1    | Deinococcus -Thermus  |
| Thermus_thermophilus       | NZ_CP014141.1  | Deinococcus -Thermus  |
| Pelotomaculum_thermopropio | NC_009454.1    | Firmicutes            |
| Alkaliphilus_oremlandii    | NC_009922.1    | Firmicutes            |
| Bifidobacterium_breve      | NZ_AP012324.1  | Actinobacteria        |
| Amphibacillus_xylanus      | NC_018704.1    | Firmicutes            |
| Geobacillus_thermoglucosid | NZ_CM001483.1  | Firmicutes            |
| Selenomonas_sputigena      | NC_015437.1    | Firmicutes            |
| Trueperella_pyogenes       | NZ_CP007003.1  | Actinobacteria        |
| Mycobacterium_immunogenum  | WP_036338669.1 | Actinobacteria        |
| Arcobacter_anaerophilusE   | WP_044419389.1 | Epsilonproteobacteria |
| Borrelia_miyamotoi         | WP_020954525.1 | Spirochaetes          |
| Sphaerochaeta_glogosa      | WP_013607055.1 | Spirochaetes          |
| Geobacter_bemidjiensisD    | WP_012532059.1 | Deltaproteobacteria   |
| Helicobacter_pyloriE       | WP_000952104.1 | Epsilonproteobacteria |
| Geopsychrobacter_eletrodip | WP_020677075.1 | Deltaproteobacteria   |
| Spirochaeta_bajacalifornie | WP_020613633.1 | Spirochaetes          |
| Pelobacter_seleniigenesD   | WP_029915705.1 | Deltaproteobacteria   |
| Cafeteria_roenbergensis    | MMETSP0942     | SAR                   |
| Chlorarachnion_reptans     | MMETSP0109     | Rhizaria              |
| Togula_jolla               | MMETSP0224     | SAR                   |
| Polarella_glacialis        | MMETSP0227     | SAR                   |
| Protoceratium_reticulatum  | MMETSP0228     | SAR                   |
| Heterosigma_akashiwo       | MMETSP0292     | SAR                   |
| Gloeochaete_witrockiana    | MMETSP1089     | Glaucophyta           |
| Aplanochytrium_sp.         | MMETSP0957     | SAR                   |
| Vaucheria_litorea          | MMETSP0945     | SAR                   |
| Lingulodinium_polyedra     | MMETSP1032     | SAR                   |

|                            |                |                     |
|----------------------------|----------------|---------------------|
| Bigelowiella_natans        | MMETSP1052     | Rhizaria            |
| Dinobryon_sp.              | MMETSP0019     | SAR                 |
| Lotharella_oceanica        | MMETSP0040     | Rhizaria            |
| Durinskia_baltica          | MMETSP0116     | SAR                 |
| Glenodinium_foliaceum      | MMETSP0118     | SAR                 |
| Kryptoperidinium_foliaceum | MMETSP0120     | SAR                 |
| Azadinium_spinosum_recA1   | MMETSP1036     | SAR                 |
| Azadinium_spinosum_recA2   | MMETSP1036     | SAR                 |
| Partenskyella_glossopodia  | MMETSP1318     | Rhizaria            |
| Synchroma_pusillum         | MMETSP1452     | SAR                 |
| Picocystis_salinarum_recA2 | MMETSP0807     | Chlorophyta         |
| Picocystis_salinarum_recA1 | MMETSP0807     | Chlorophyta         |
| Pycnococcus_provasolli     | MMETSP1471     | Chlorophyta         |
| Stichococcus_sp.           | MMETSP1473     | Chlorophyta         |
| Pyraminonas_parkeae        | MMETSP0058     | Chlorophyta         |
| Helicosporidium_sp.        | KDD76638       | Chlorophyta         |
| Picochlorum_sp.            | MMETSP0467     | Chlorophyta         |
| Arabidopsis_thaliana_RecA4 | NP_001190003.1 | Chlorophyta         |
| Ochromonas_sp.             | MMETSP0005     | SAR                 |
| Eucampia_antarctica        | MMETSP1437     | SAR                 |
| Mallomonas_sp.             | MMETSP1167     | SAR                 |
| Norrisiella_sphaerica      | MMETSP0113     | Rhizaria            |
| Dunaliella_tertiolecta     | MMETSP1126     | Chlorophyta         |
| Gymnochlora_sp.            | MMETSP0110     | Rhizaria            |
| Synedropsis_recta          | MMETSP1176     | SAR                 |
| Mesodinium_pulex           | MMETSP0467     | SAR                 |
| Cand.Paracaedibacter_acant | WP_038466109   | Alphaproteobacteria |
| Acidomonas_methanilica     | WP_042058192   | Alphaproteobacteria |
