# Supplementary material
Source: PubMed Central journal article supplement (PMC5069510)

0.2

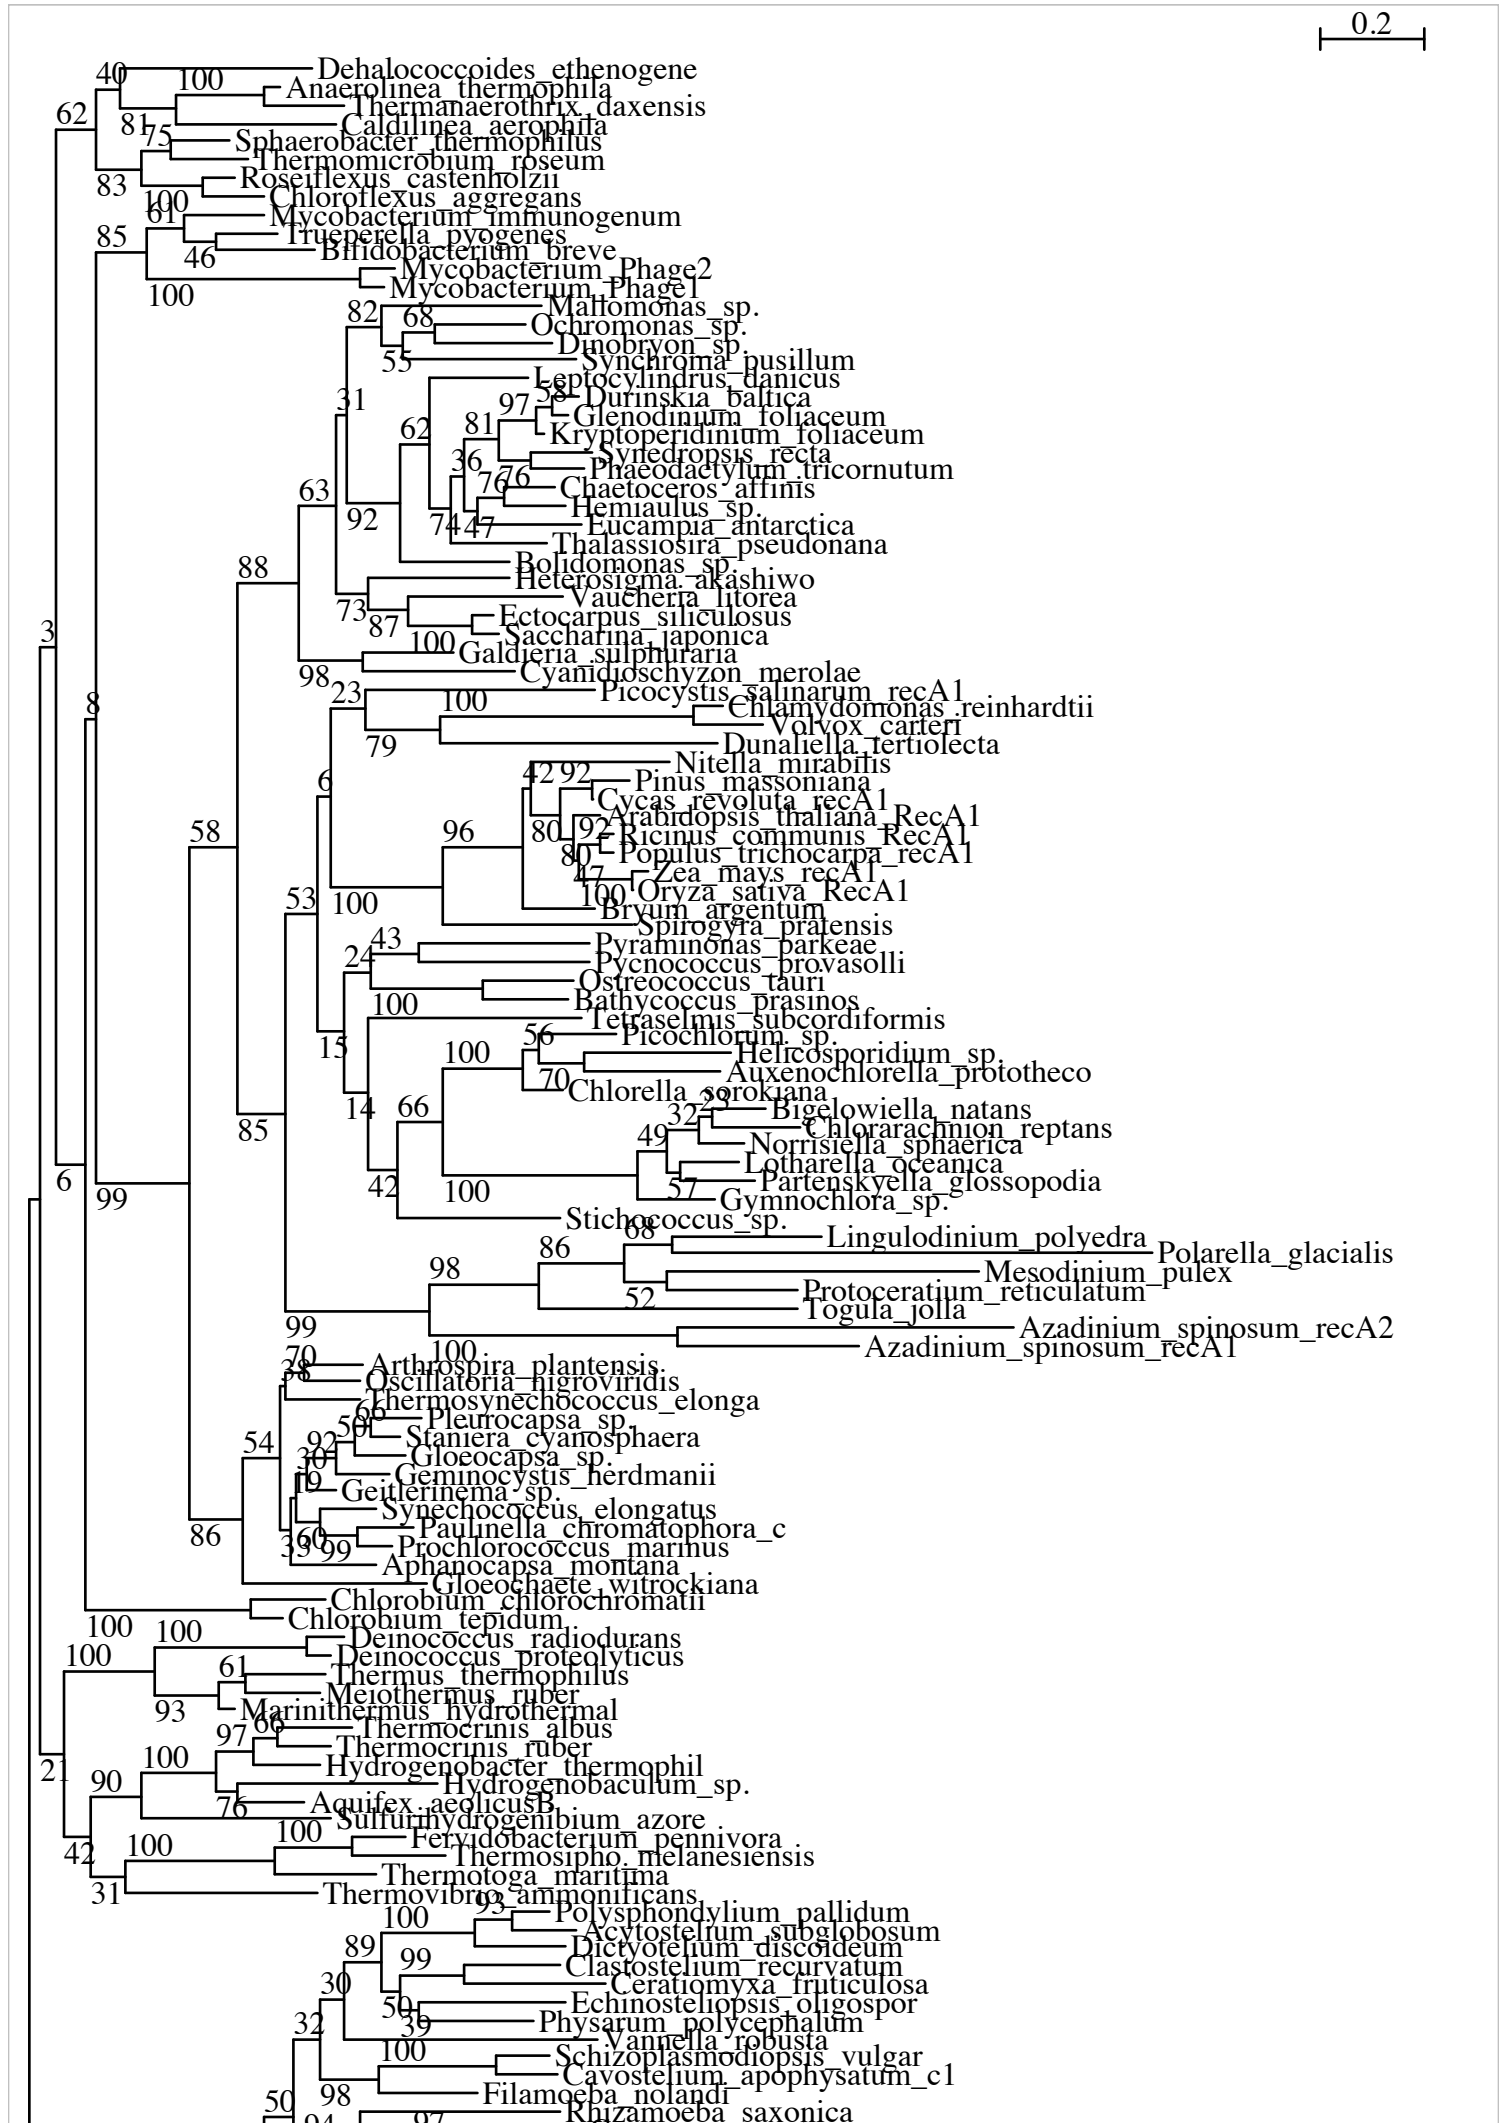

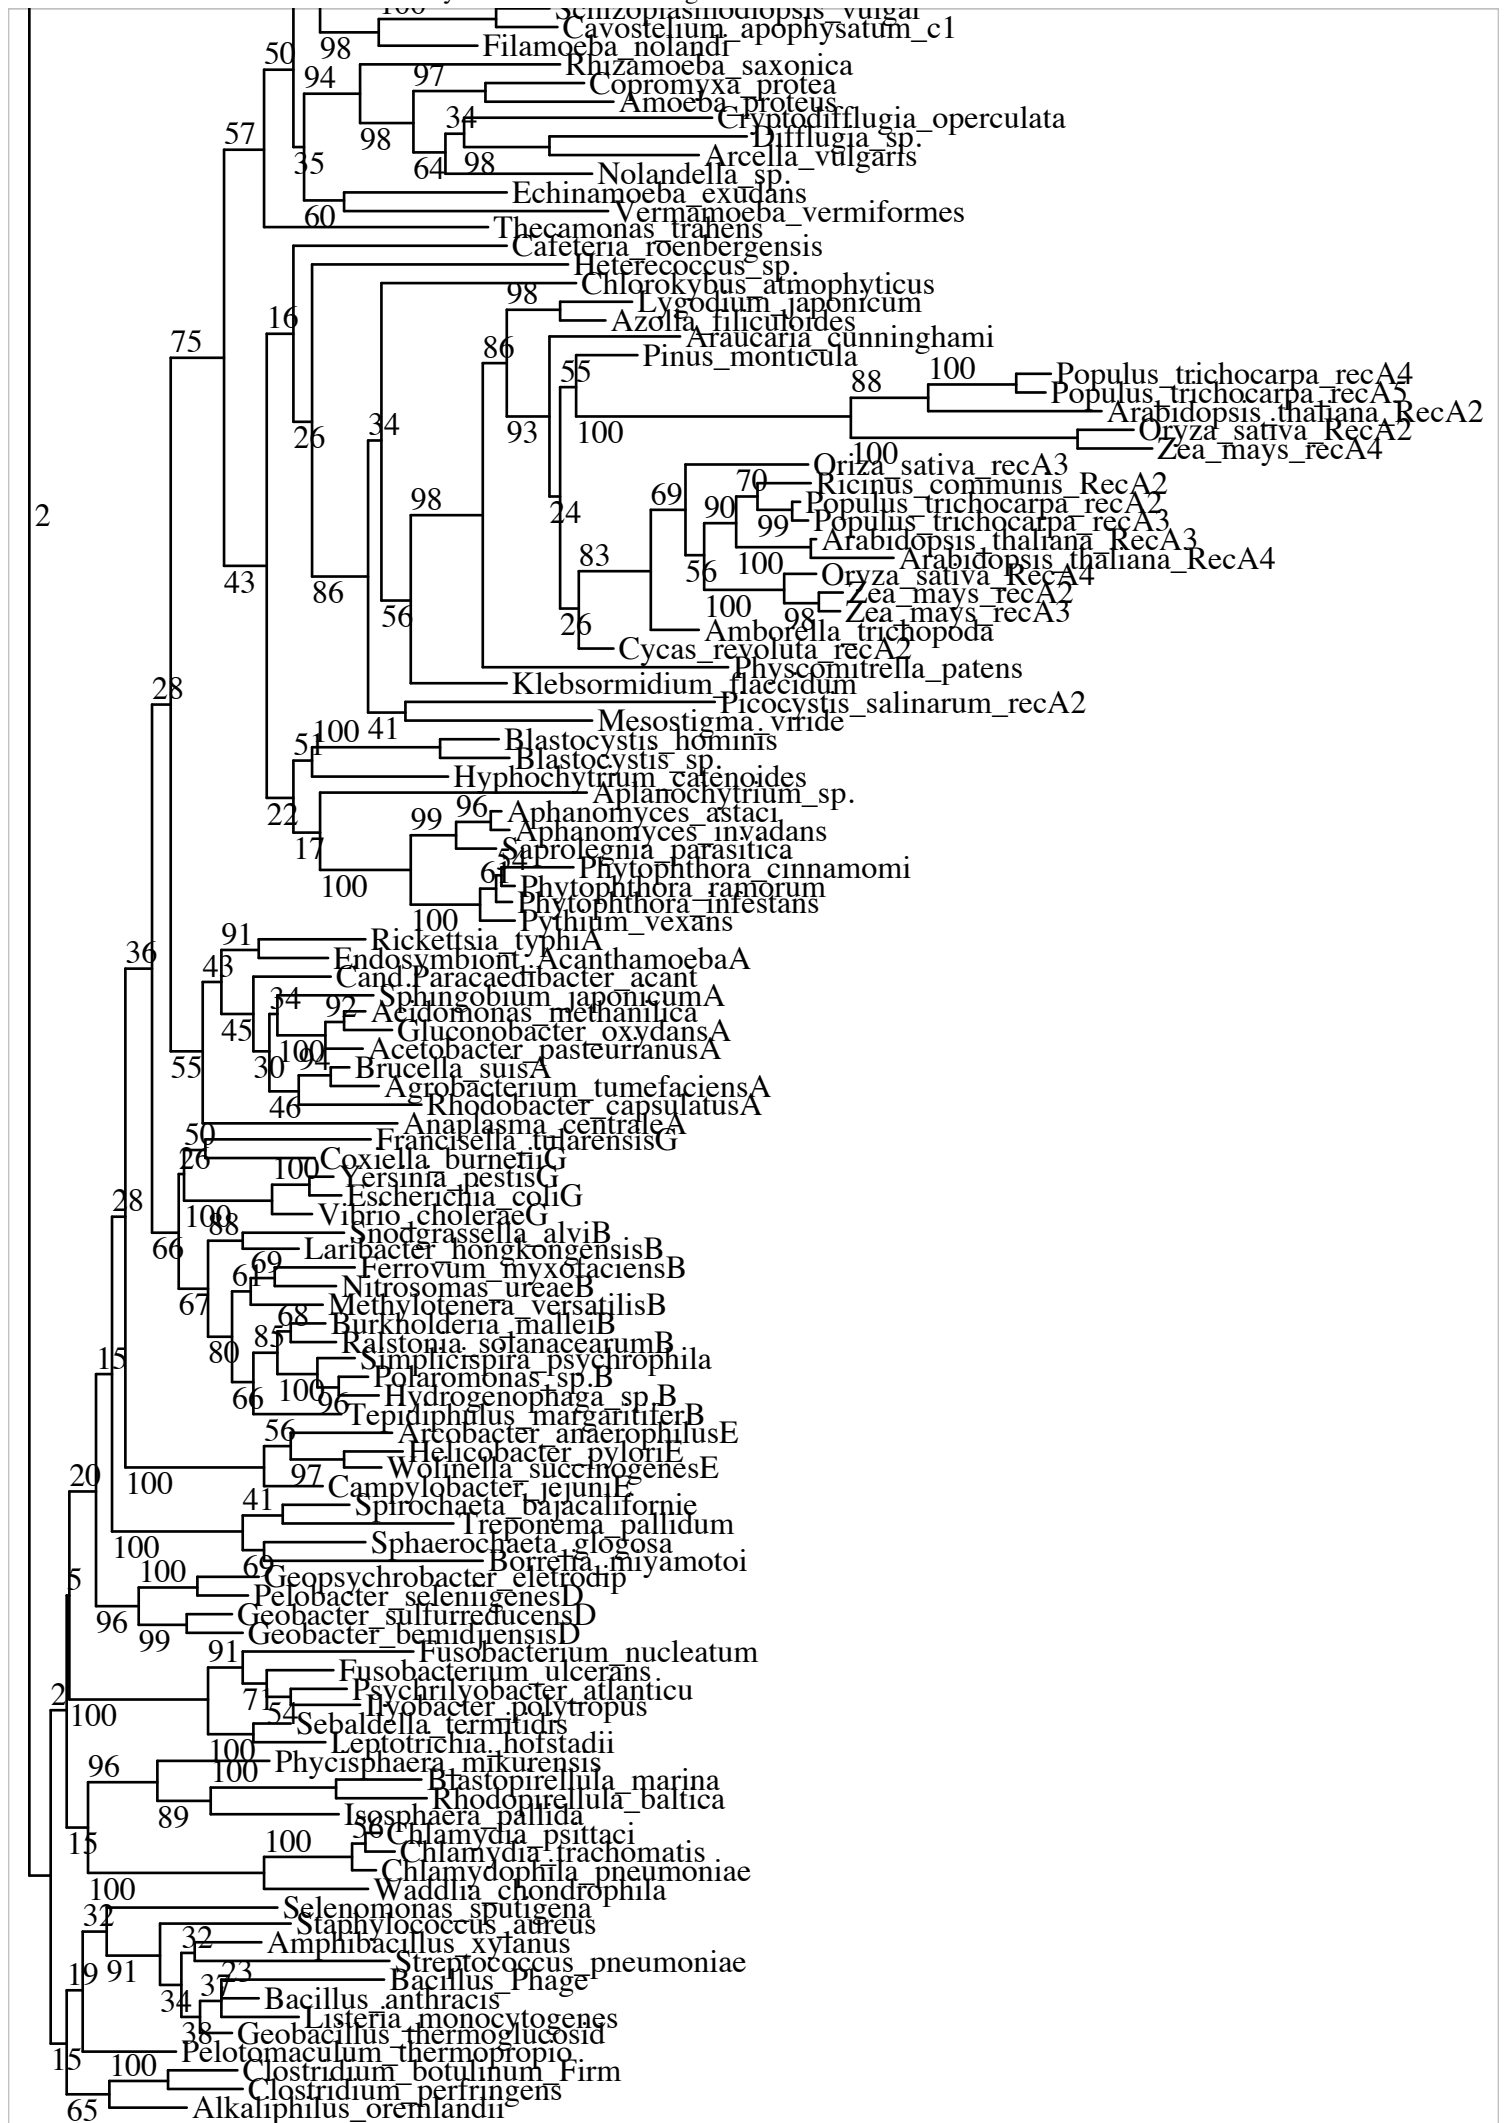

Supplement: rspb20161453supp1.pdf [file rspb20161453supp1.pdf]

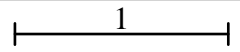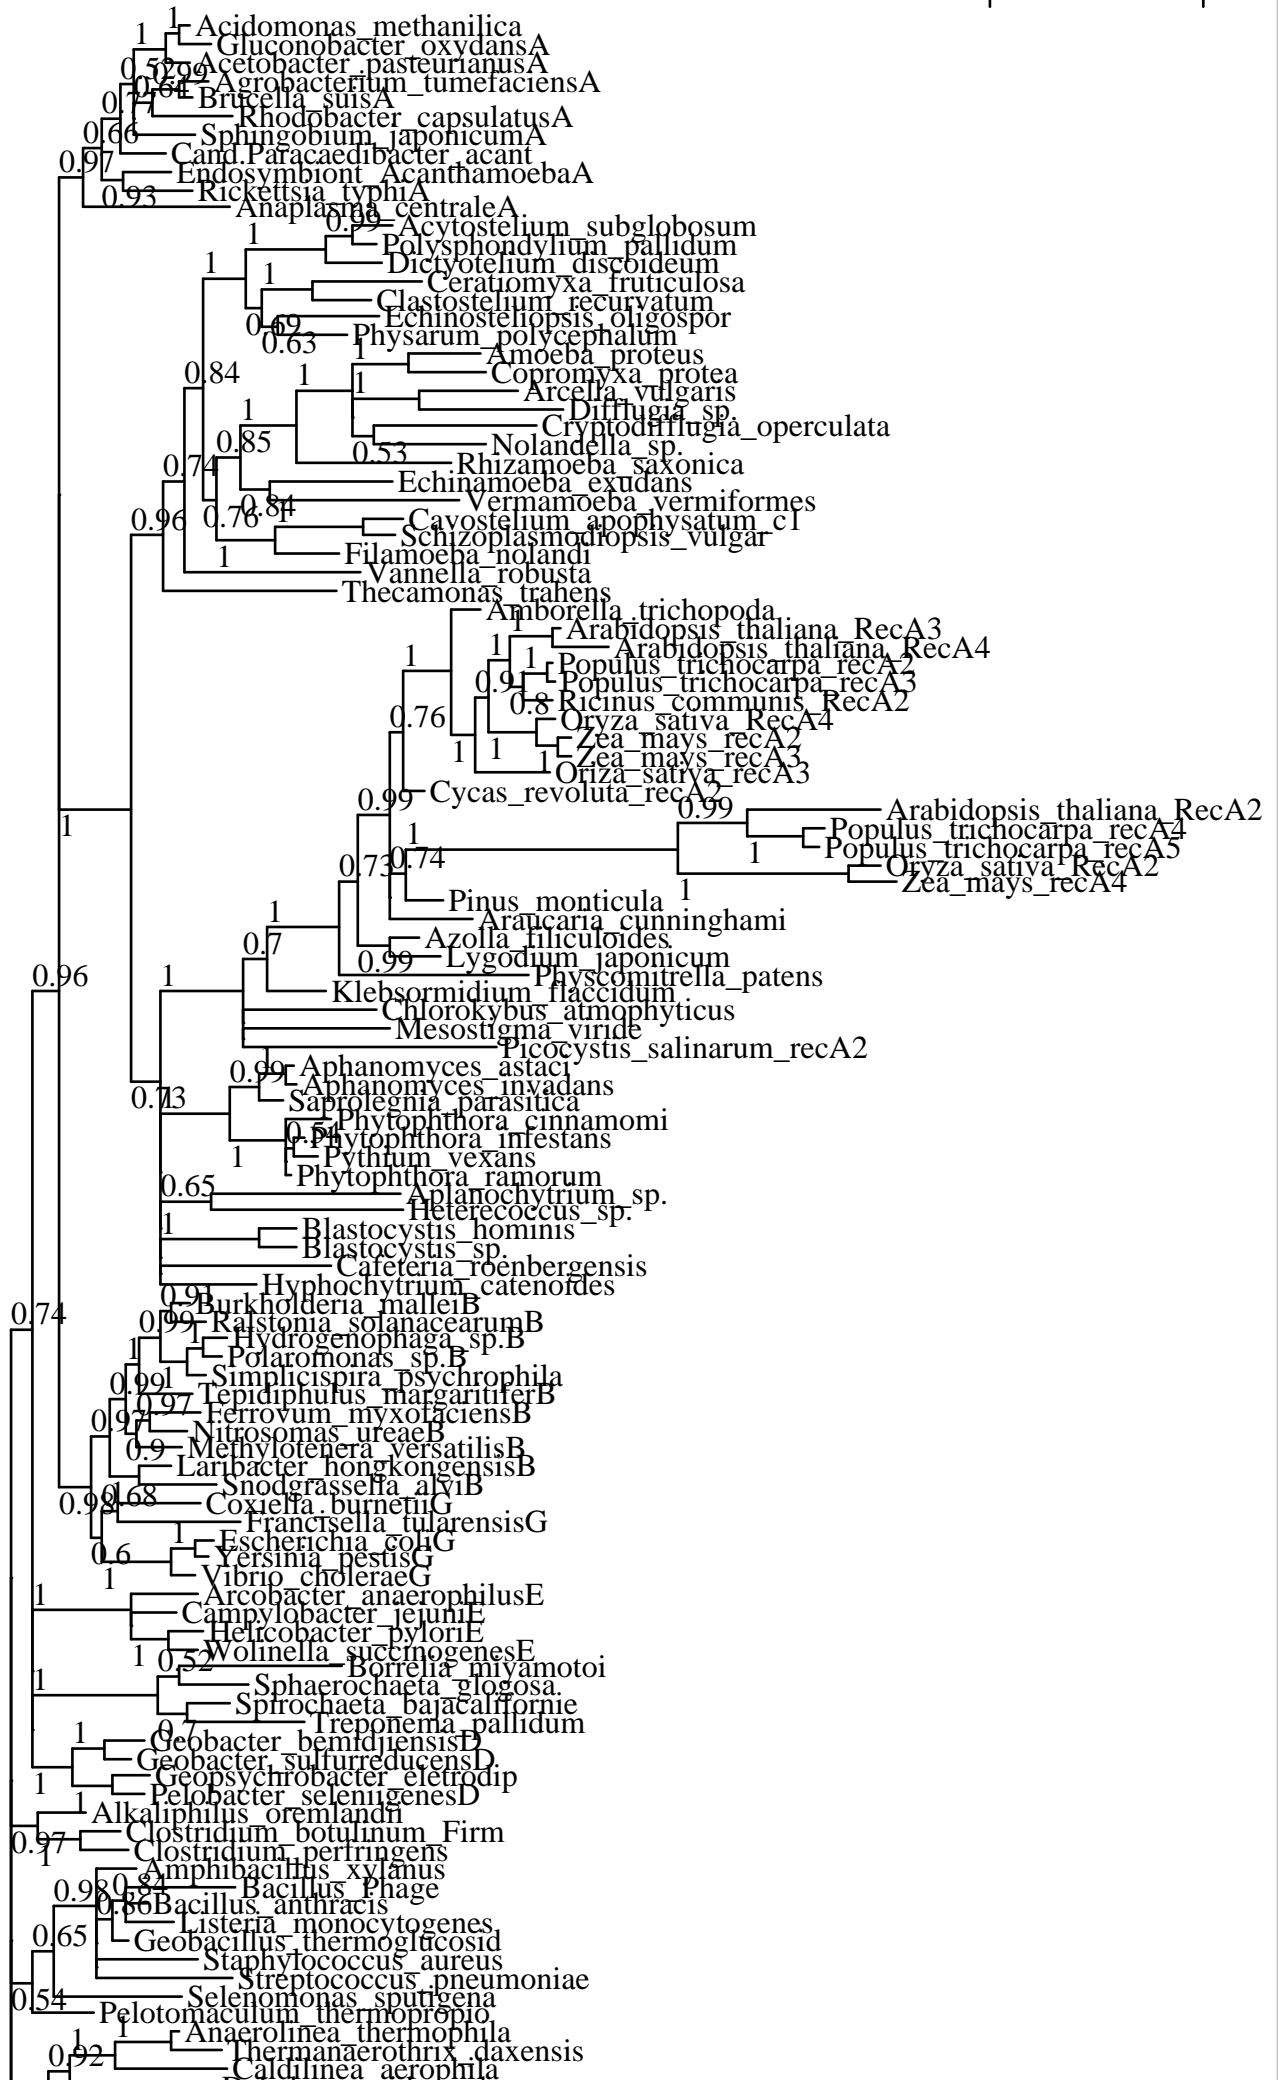

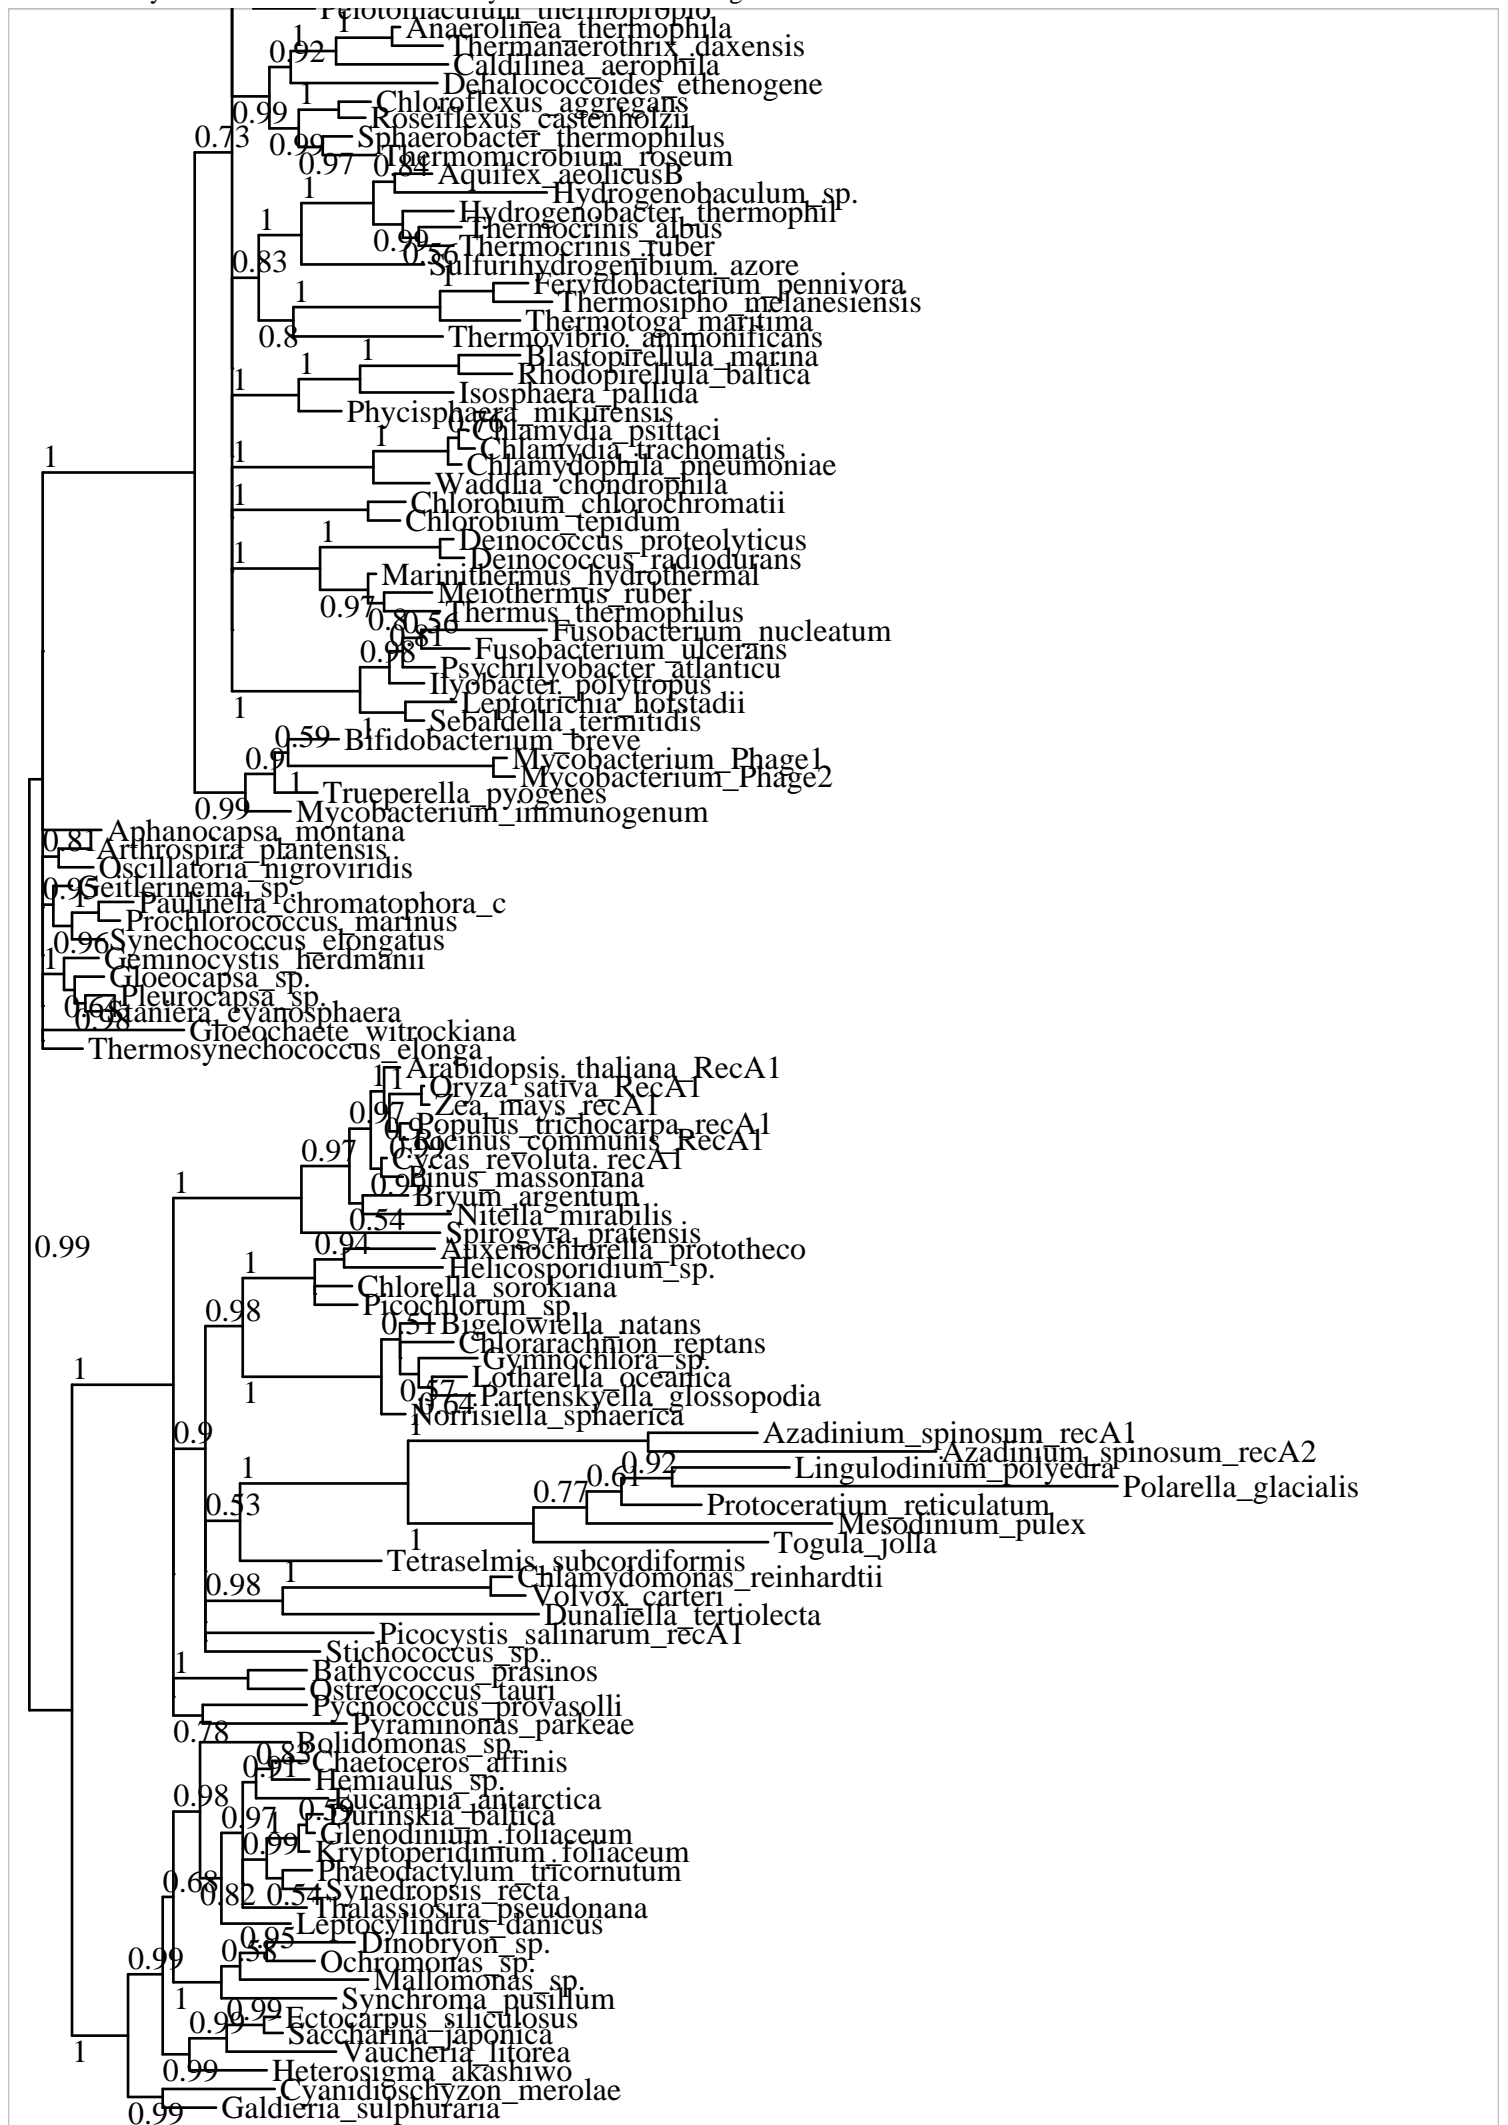

Supplement: rspb20161453supp2.pdf [file rspb20161453supp2.pdf]
